# Supplementary material
Source: publisher figshare collection journal article supplement (https://acs.figshare.com/ndownloader/files/27538178)
Supplement: Supplementary file 1 [file 27538178]

Supporting information

# Enhancement of $\text{NH}_3$ Production in Electrochemical $\text{N}_2$ Reduction by the Cu-Rich Inner Surfaces of Beveled CuAu Nanoboxes

Biva Talukdar,<sup>†,‡,°</sup> Tung-Chun Kuo,<sup>‡</sup> Brian T. Sneed,<sup>||</sup> Lian-Ming Lyu,<sup>§</sup> Hung-Min Lin,<sup>†,⊥</sup>  
Yu-Chun Chuang,<sup>¶</sup> Mu-Jeng Cheng<sup>\*,‡</sup> and Chun-Hong Kuo<sup>\*,†,△</sup>

<sup>†</sup>*Institute of Chemistry, Academia Sinica, Taipei 11529, Taiwan*

<sup>#</sup>*Sustainable Chemical Science and Technology, Taiwan International Graduate Program,  
Academia Sinica and National Yang Ming Chiao Tung University, Taipei 11529, Taiwan*

<sup>°</sup>*Department of Applied Chemistry, National Yang Ming Chiao Tung University, Hsinchu 30010,  
Taiwan*

<sup>‡</sup>*Department of Chemistry, National Cheng Kung University, Tainan 70101, Taiwan*

<sup>||</sup>*Cabot Microelectronics, Aurora, Illinois 60504, United States*

<sup>§</sup>*Department of Materials Science and Engineering, National Tsing Hua University, Hsinchu  
30013, Taiwan*

<sup>⊥</sup>*Department of Chemistry, National Taiwan University, Taipei 10617, Taiwan*

<sup>¶</sup>*National Synchrotron Radiation Research Center, Hsinchu 30076, Taiwan*

<sup>△</sup>*Institute of Materials Science and Engineering, National Central University, Taoyuan 32001,  
Taiwan*

## Contact information of corresponding authors

\*(M.-J. C.) E-mail: mjcheng@mail.ncku.edu.tw

\*(C.-H. K.) E-mail: chunhong@gate.sinica.edu.tw

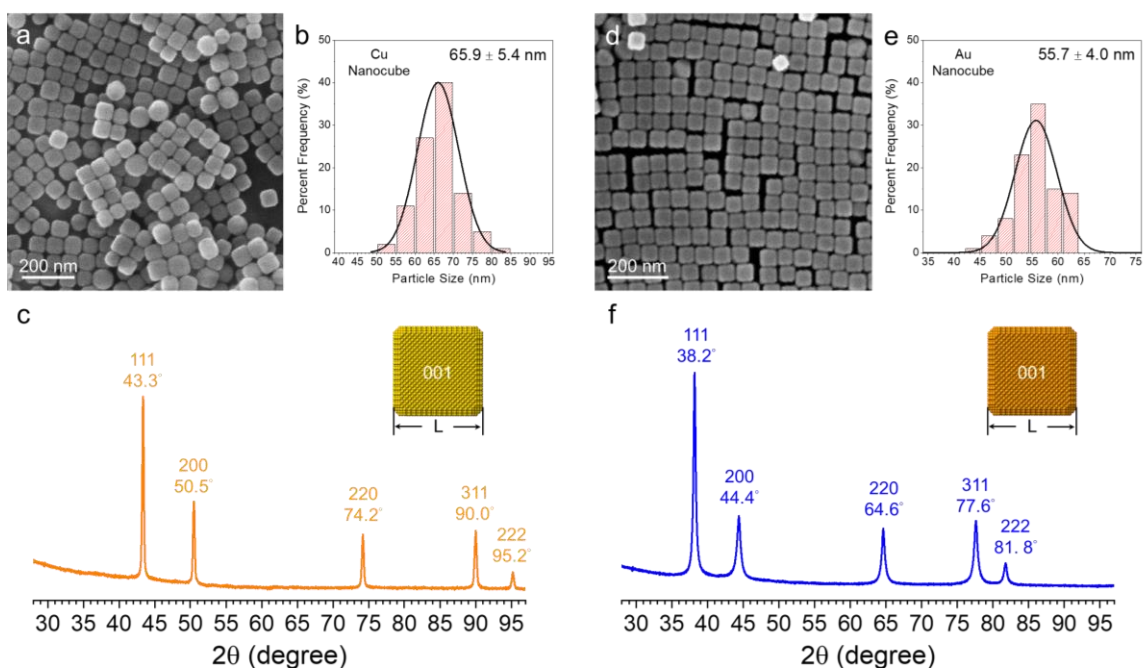

**Figure S1.** (a, d) SEM images, (b, e) size-distribution histograms, and (c, f) PXRD patterns of (a-c) Cu, and (d-f) Au nanocubes.

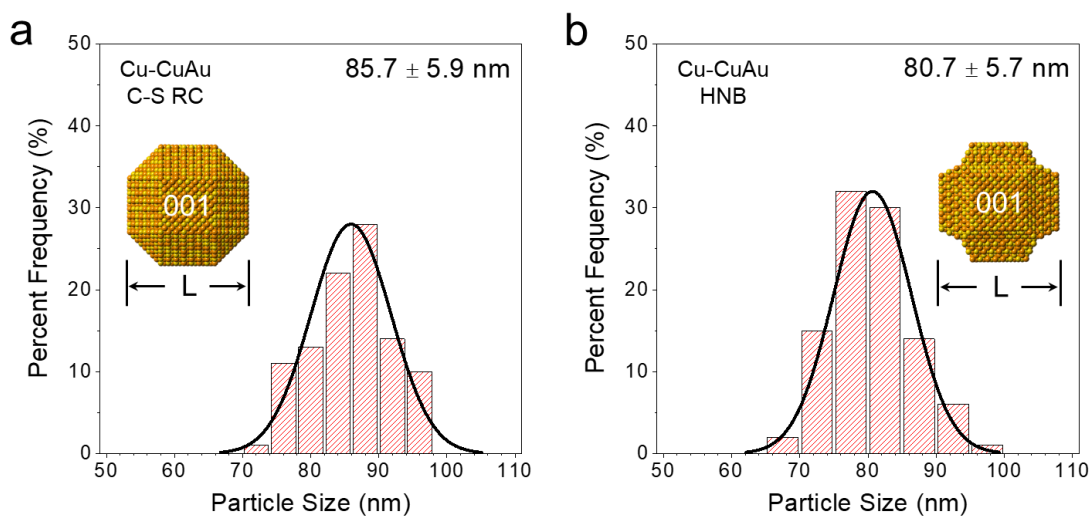

**Figure S2.** Size-distribution histograms of (a) rhombic cuboctahedral Cu-CuAu core-shell nanocrystals, and (b) their corresponding hollow nanocages after removing Cu cores.

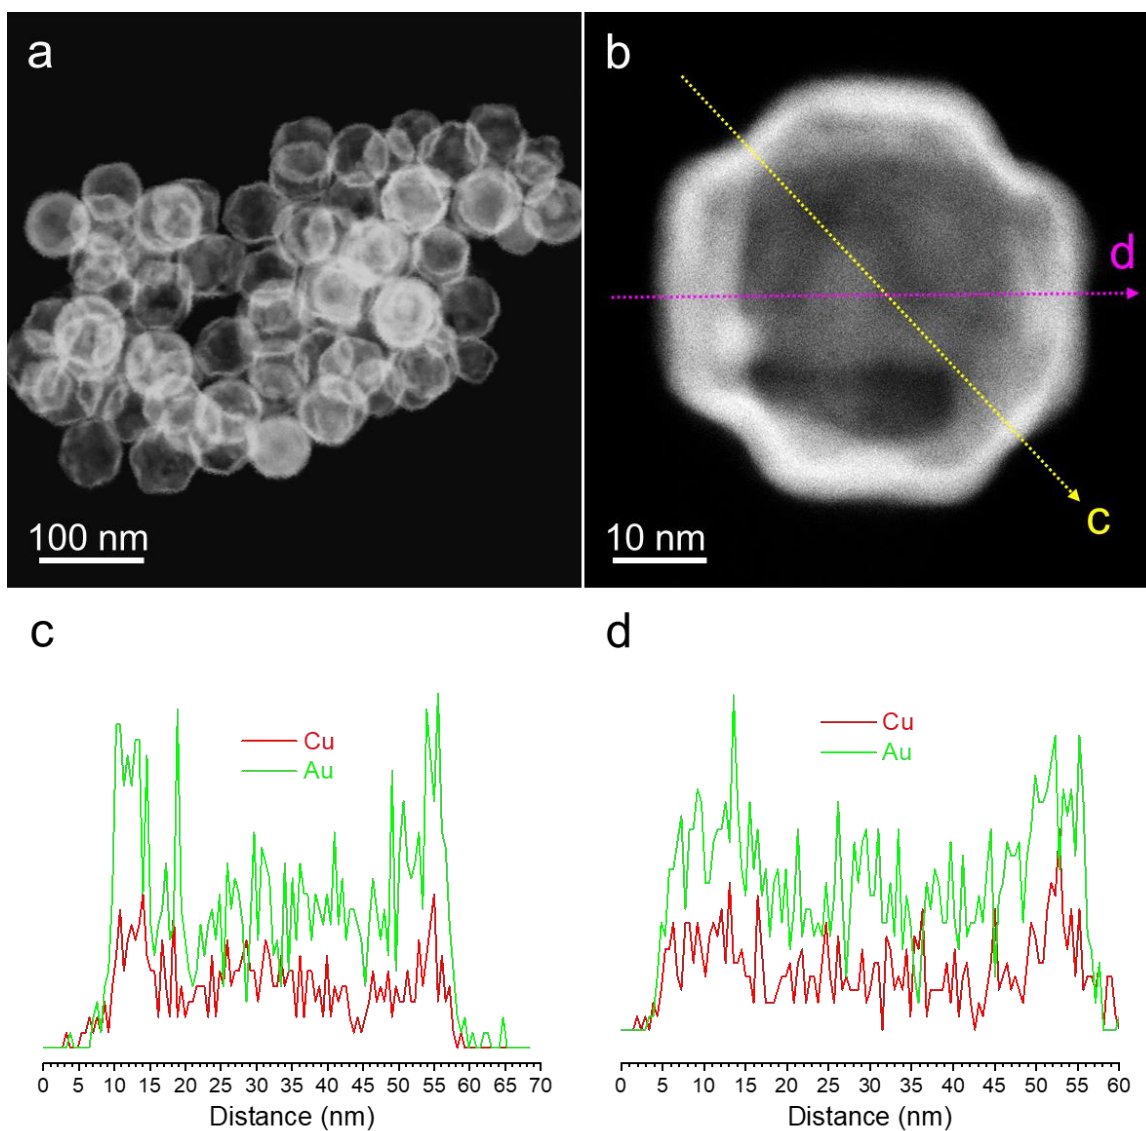

**Figure S3.** HAADF-STEM images of (a) multiple and (b) a single CuAu nanoboxes. The single nanocage is viewed along the [100] direction. (c, d) EDS line-scan profiles of the single nanobox along the yellow (c) and pink (d) cross sections.

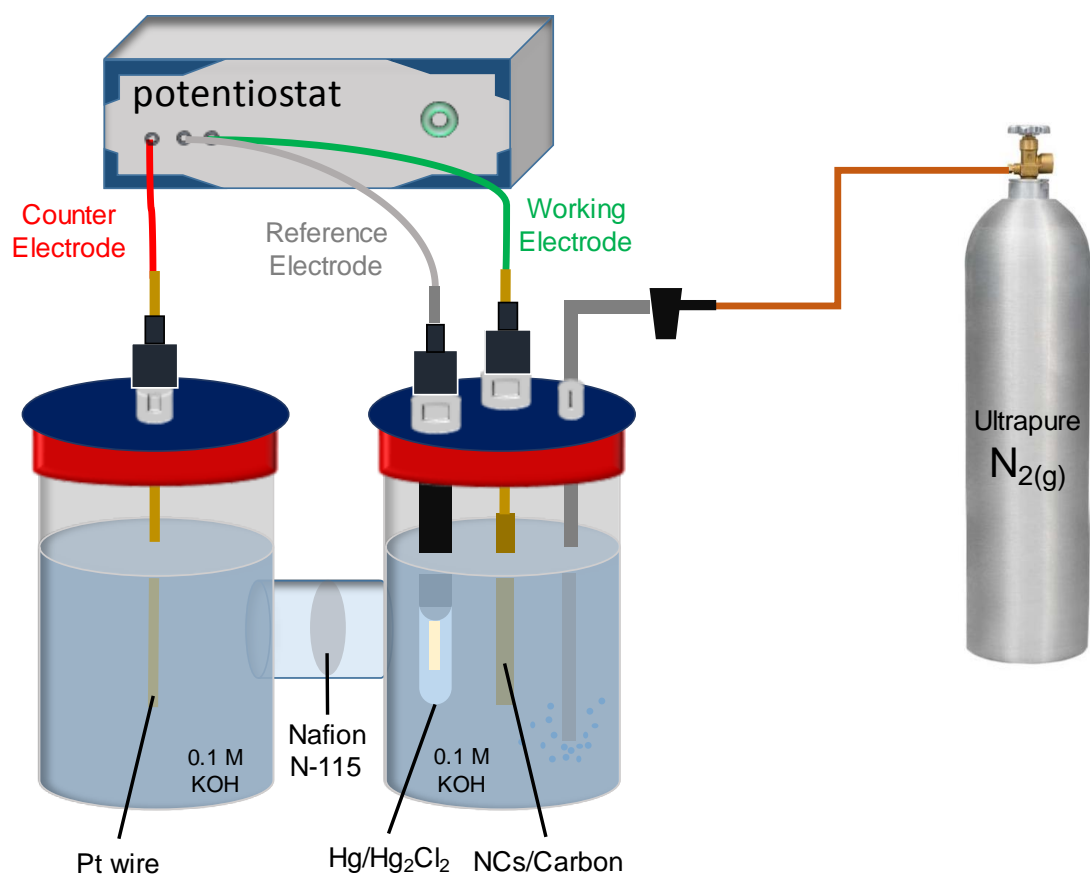

**Figure S4.** Schematic illustration for the setup of electrochemical  $N_2$  reduction reaction.

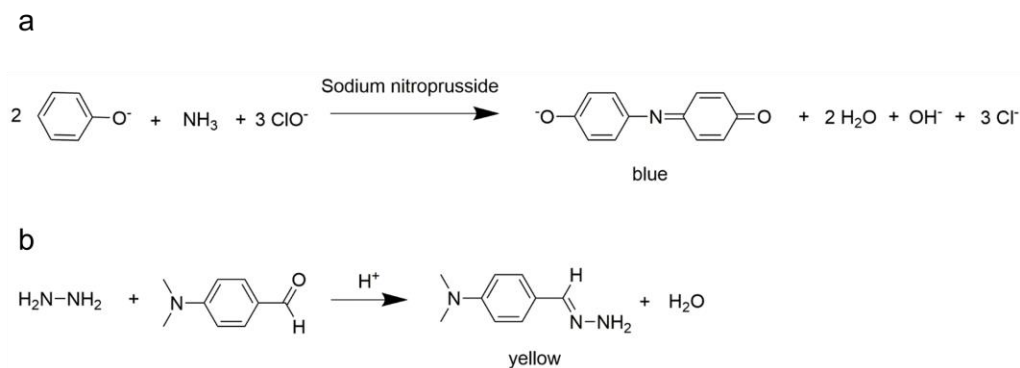

**Figure S5.** The condensation reactions for (a) indophenol blue method, and (b) Watt and Chrisp's Method.

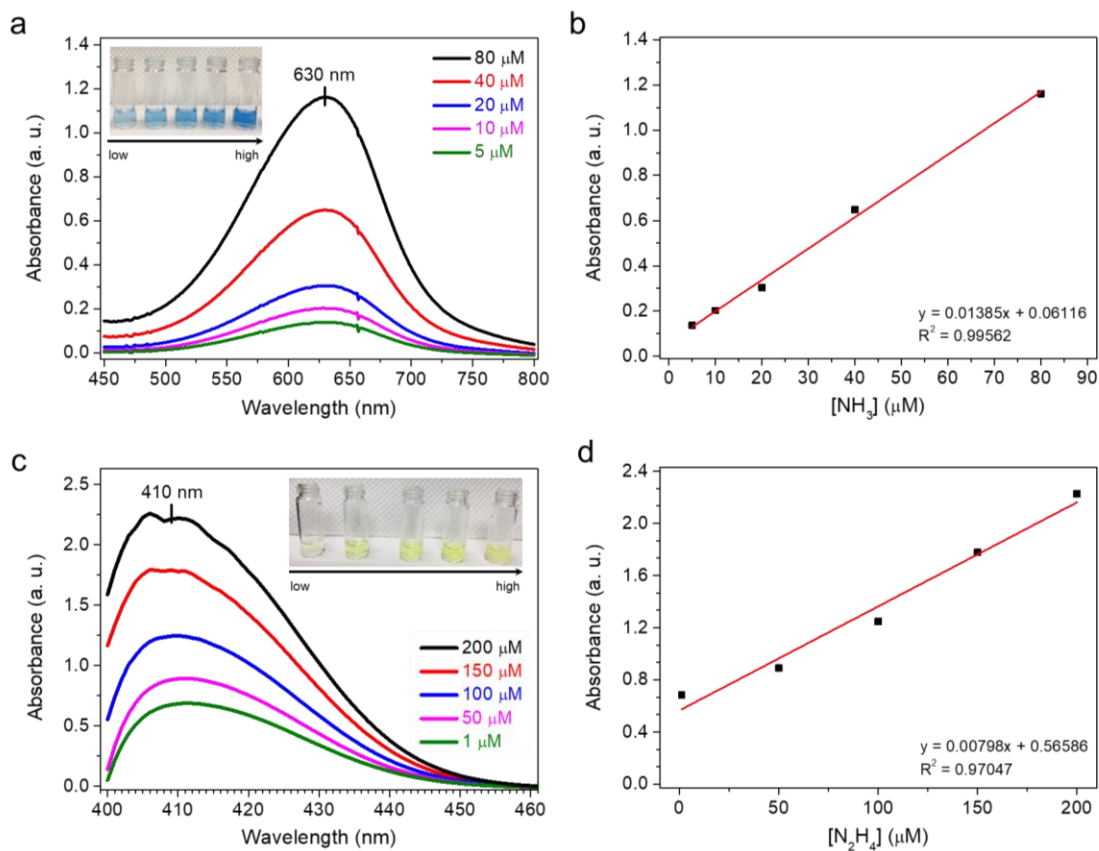

**Figure S6.** UV-Vis spectra and calibration plots of (a, b) indophenol blue method for  $\text{NH}_3$  quantification and (c, d) Watt and Chrisp's method for  $\text{N}_2\text{H}_4$  quantification.

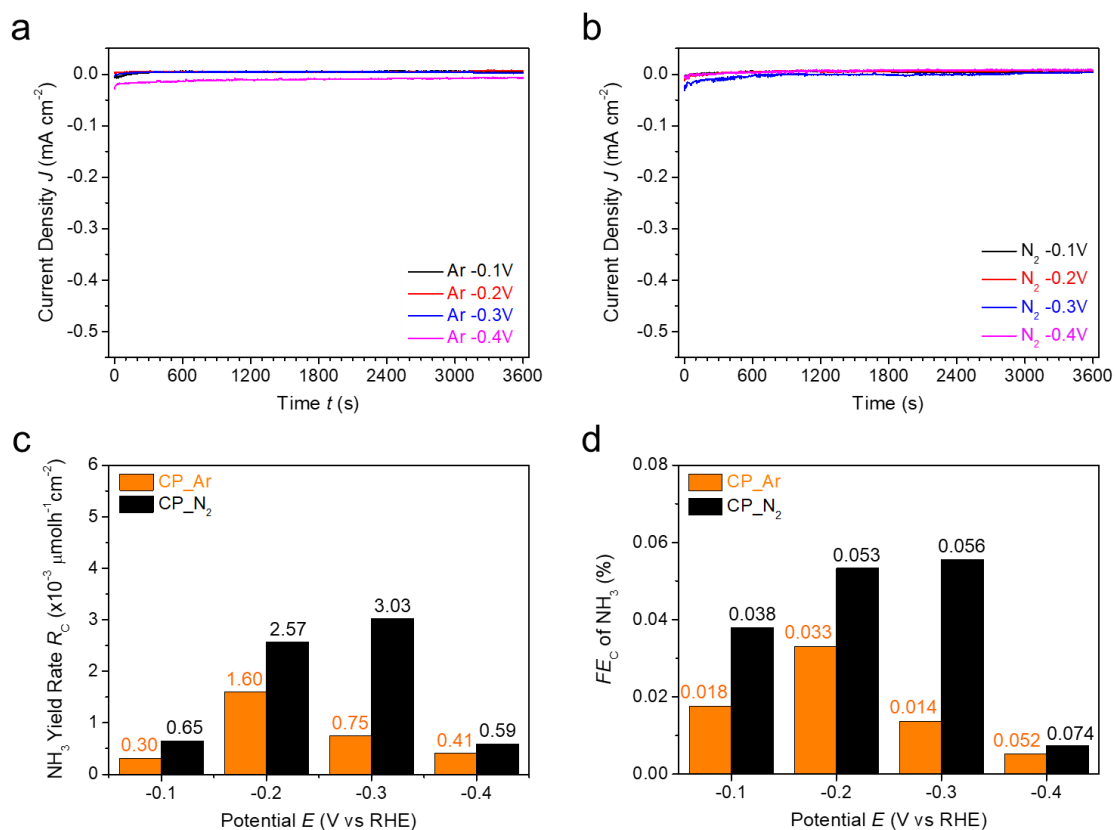

**Figure S7.**  $J-t$  plots of the bare carbon paper operated under (a) Ar and (b) N<sub>2</sub> flow, and their corresponding  $E$ -dependent distributions in (c) NH<sub>3</sub> yield rates and (d) Faradaic efficiencies.

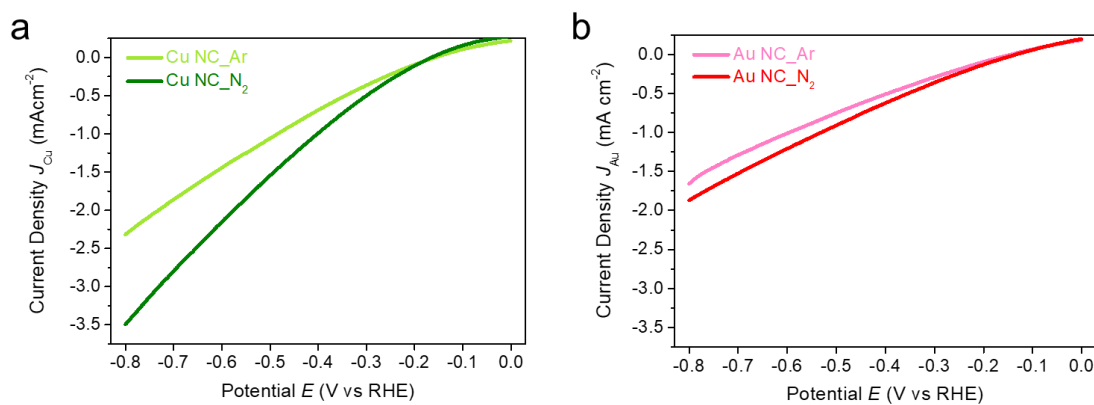

**Figure S8.** LSV plots of (a) Cu and (b) Au NC-catalyzed reduction under Ar and N<sub>2</sub> flow at the scan rate of 50 mV/s.

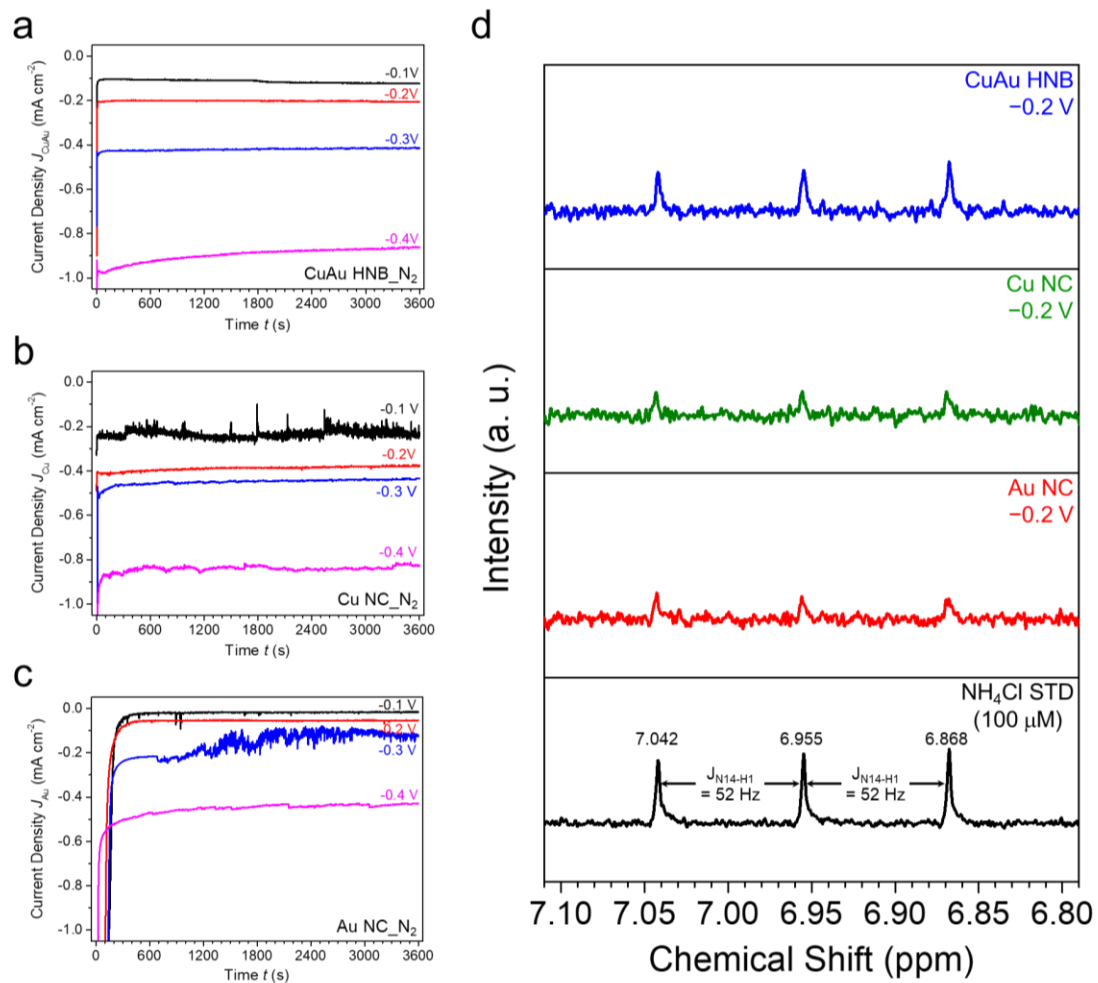

**Figure S9.**  $J$ - $t$  plots of  $\text{N}_2\text{RR}$  catalyzed by (a) CuAu HNBs, (b) Cu NCs, and (c) Au NCs at the constant potentials of -0.1, -0.2, -0.3, and -0.4 V for an hour. (d)  $^1\text{H}$  NMR spectra of the electrolyte solutions for the catalysts and a standard solution of 100  $\mu\text{M}$   $\text{NH}_4\text{Cl}$ .

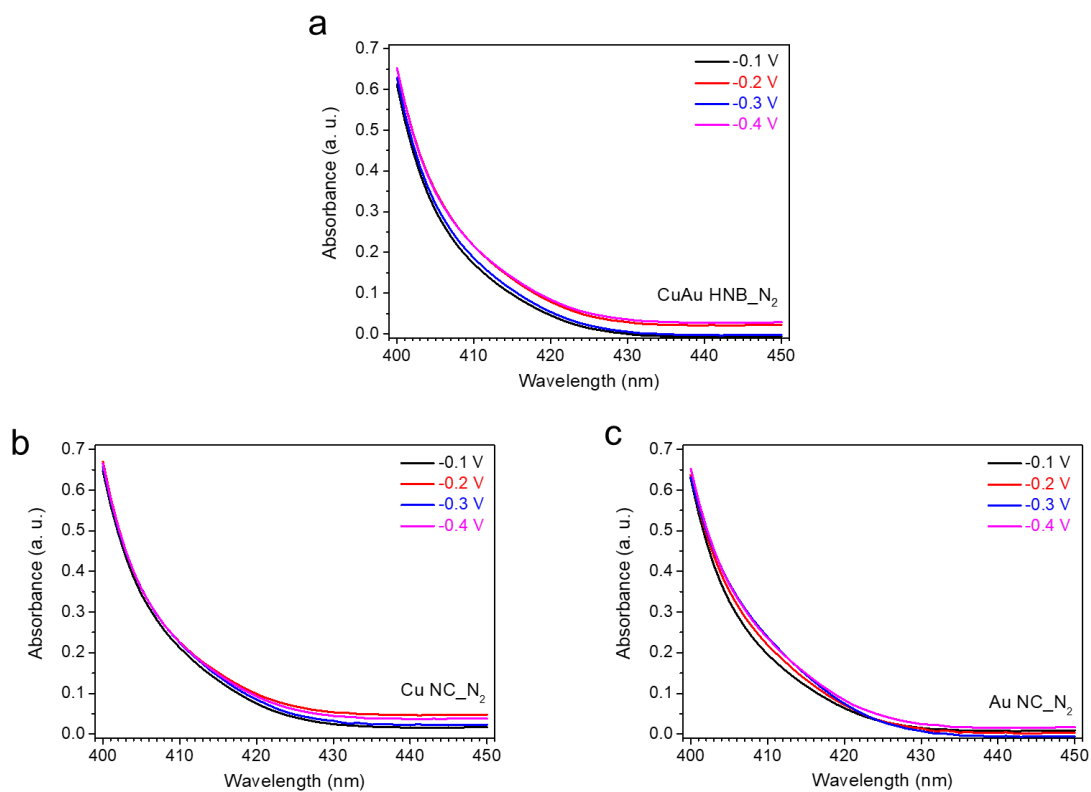

**Figure S10.** UV-Vis spectra measurements based on the Watt and Chrisp's method show no detectable N<sub>2</sub>H<sub>4</sub> in the N<sub>2</sub>RR catalyzed by (a) CuAu HNBs, (b) Cu NCs, and (c) Au NCs.



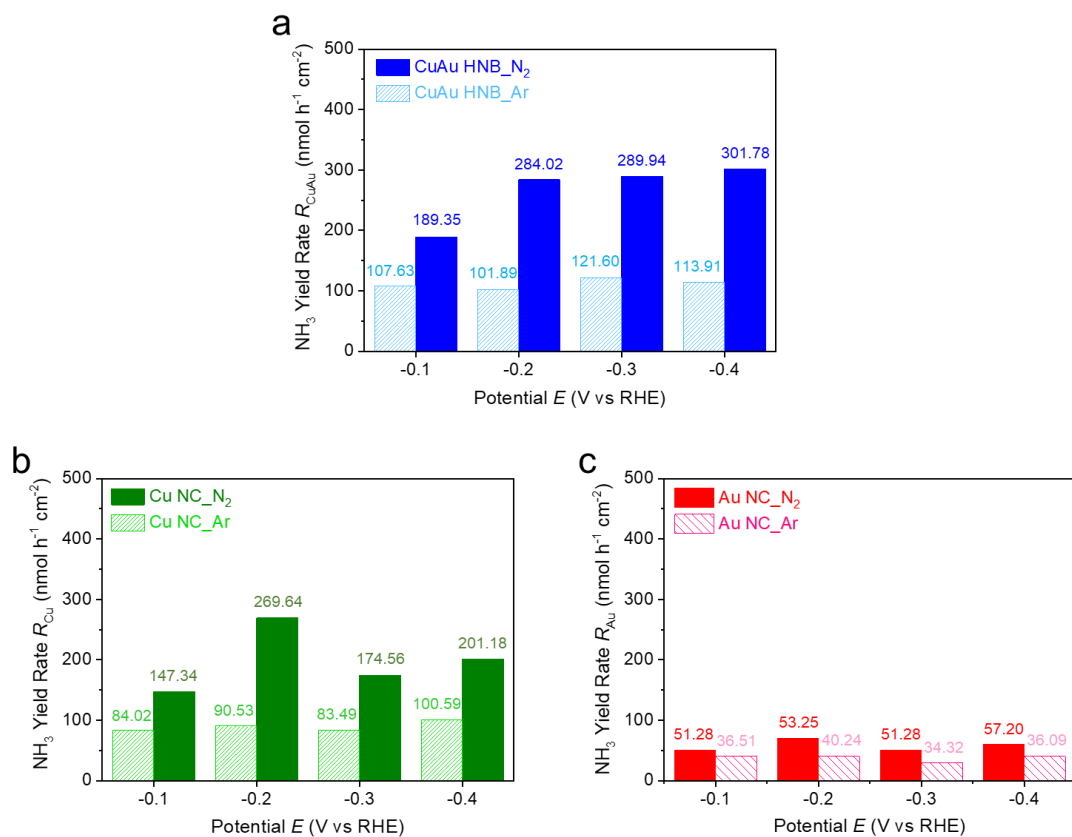

**Figure S11.** NH<sub>3</sub> yield rates of (a) CuAu HNB-, (b) Cu NC-, and (c) Au NC-catalyzed reduction reactions under Ar and N<sub>2</sub> flow.

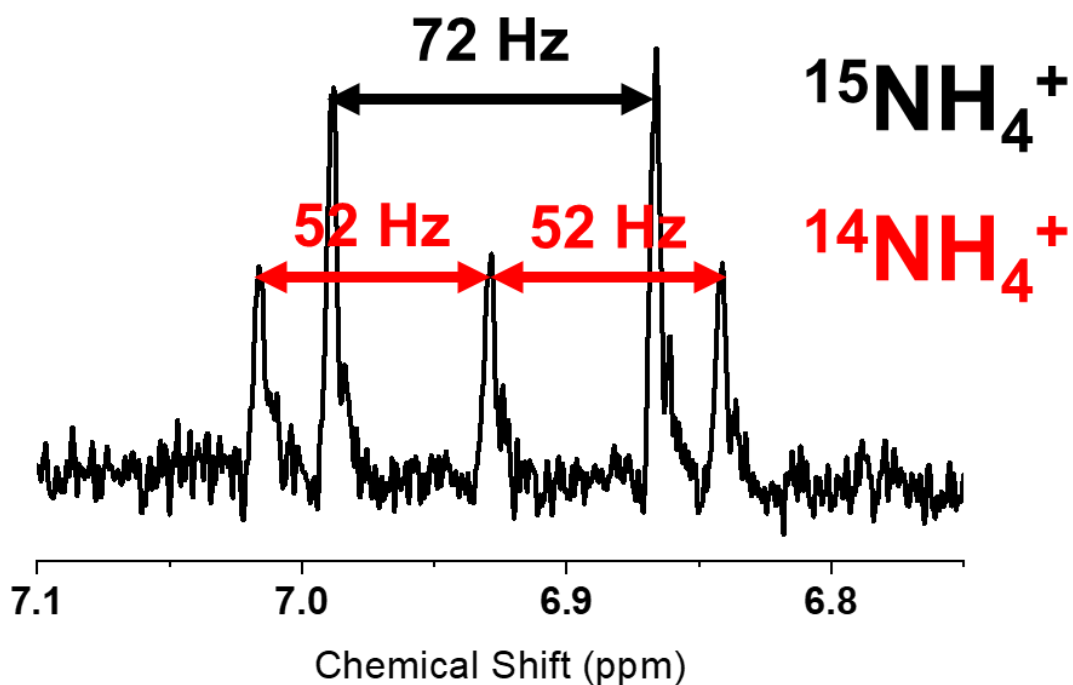

**Figure S12.**  $^1\text{H}$  NMR spectrum of the electrolyte solution saturated with  $^{15}\text{N}_2$  gas catalyzed by the HNBs. The signals of products contain the triplet peaks with a coupling constant of 52 Hz from the coupling between  $^1\text{H}$  and  $^{14}\text{N}$  (spin 1), and the doublet peaks with a coupling constant of 72 Hz due to the coupling between  $^1\text{H}$  and  $^{15}\text{N}$  (spin 1/2).

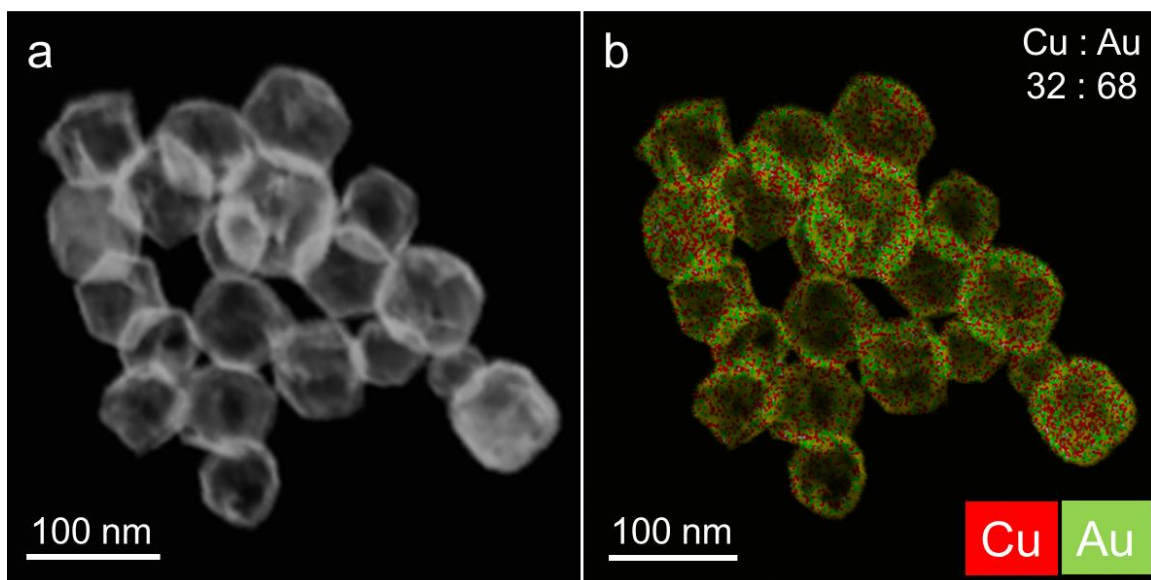

**Figure S13.** (a) HAADF-STEM image and (b) EDS map of CuAu HNBS after durability test.

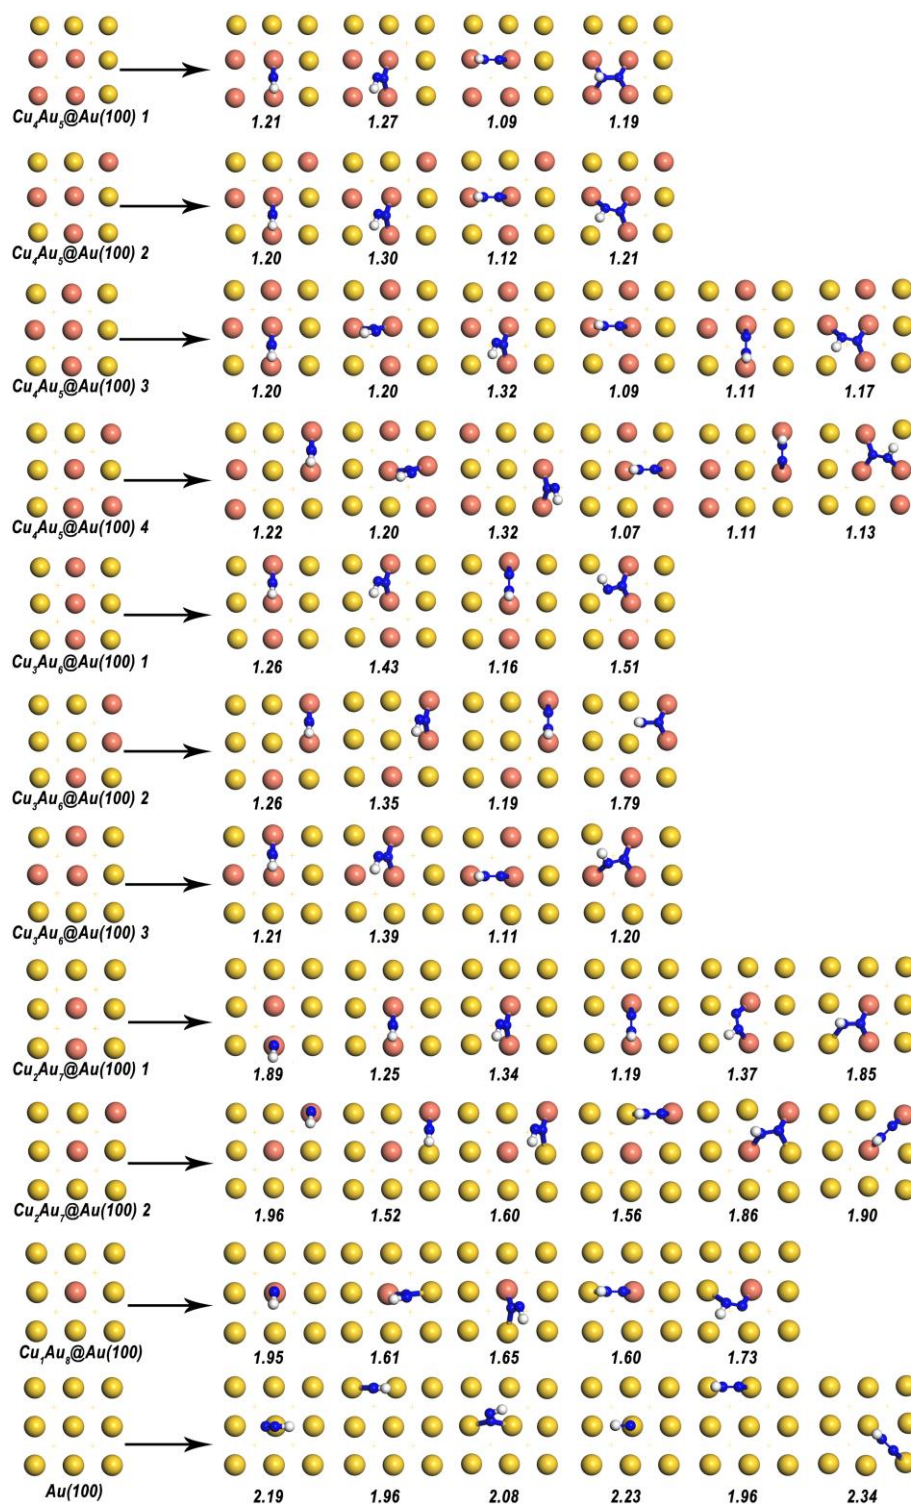

**Figure S14.** \*NNH adsorption configurations considered for Cu<sub>n</sub>Au<sub>(9-n)</sub>@Au(100) with  $n = 0$  to 4.

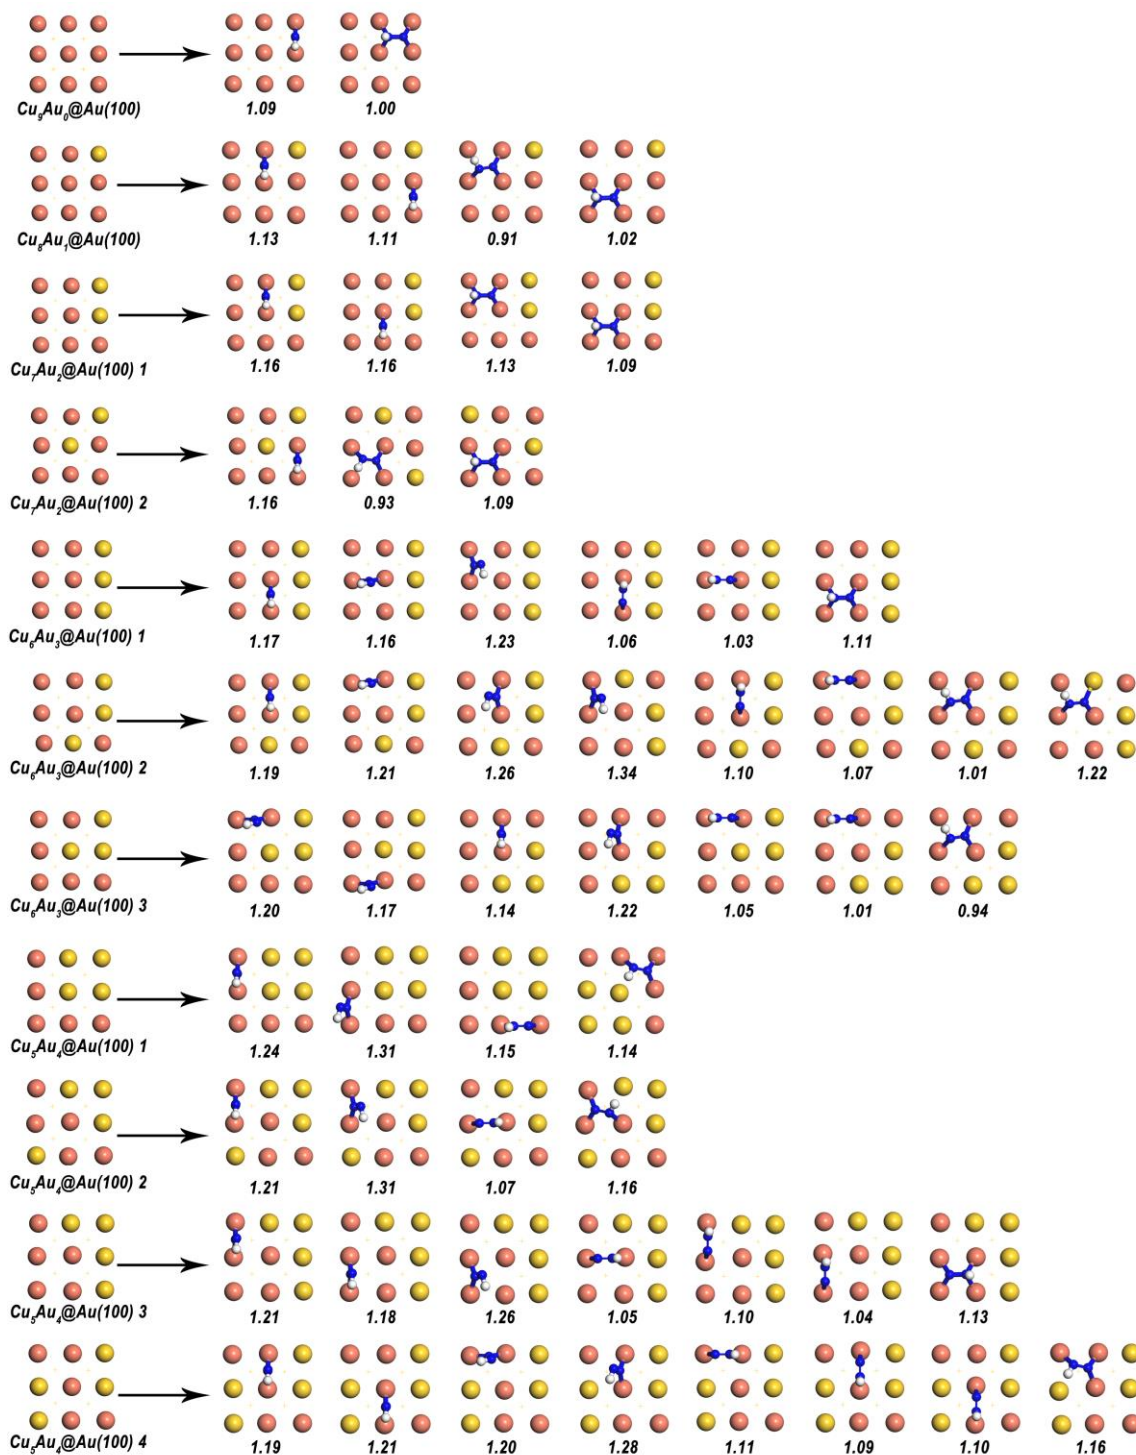

**Figure S15.** \*NNH adsorption configurations considered for Cu<sub>n</sub>Au<sub>(9-n)</sub>@Au(100) with  $n = 5$  to 9.



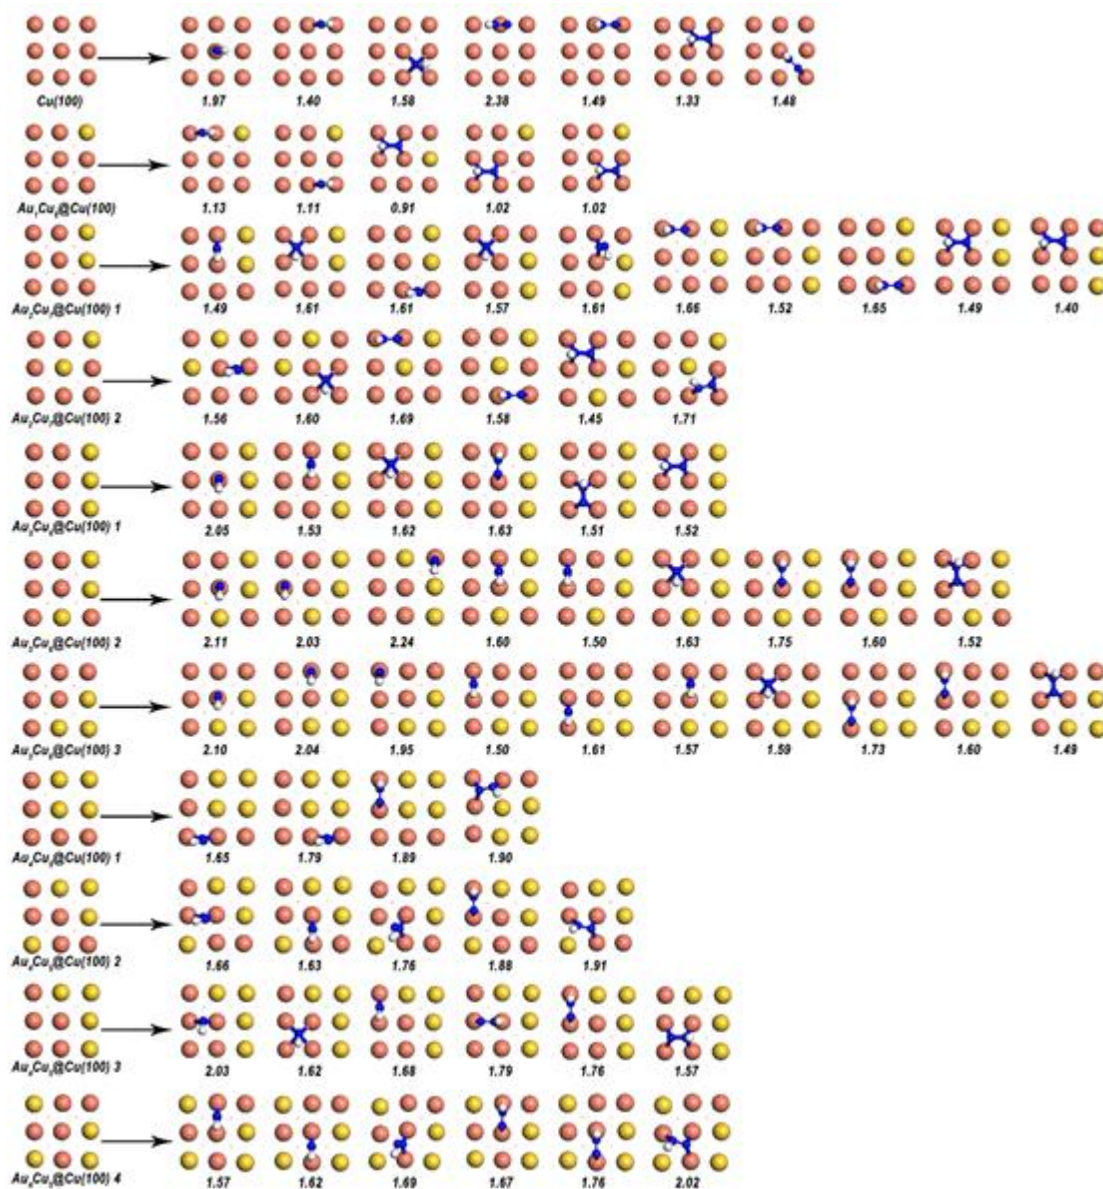

**Figure S16.** \*NNH adsorption configurations considered for  $\text{Au}_n\text{Cu}_{(9-n)}@Cu(100)$  with  $n = 0$  to 4.

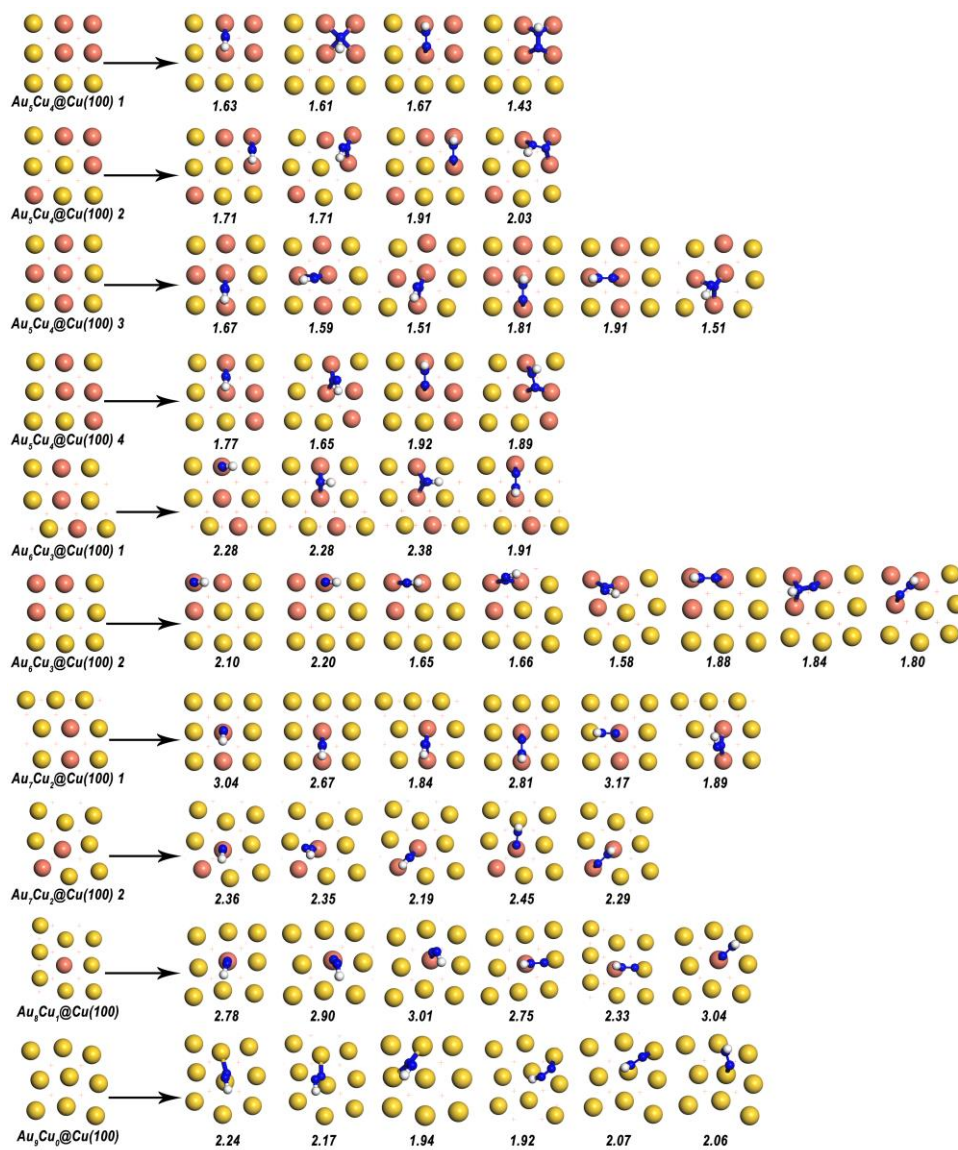

**Figure S17.** \*NNH adsorption configurations considered for  $\text{Au}_n\text{Cu}_{(9-n)}\text{@Cu}(100)$  with  $n = 5$  to 9.

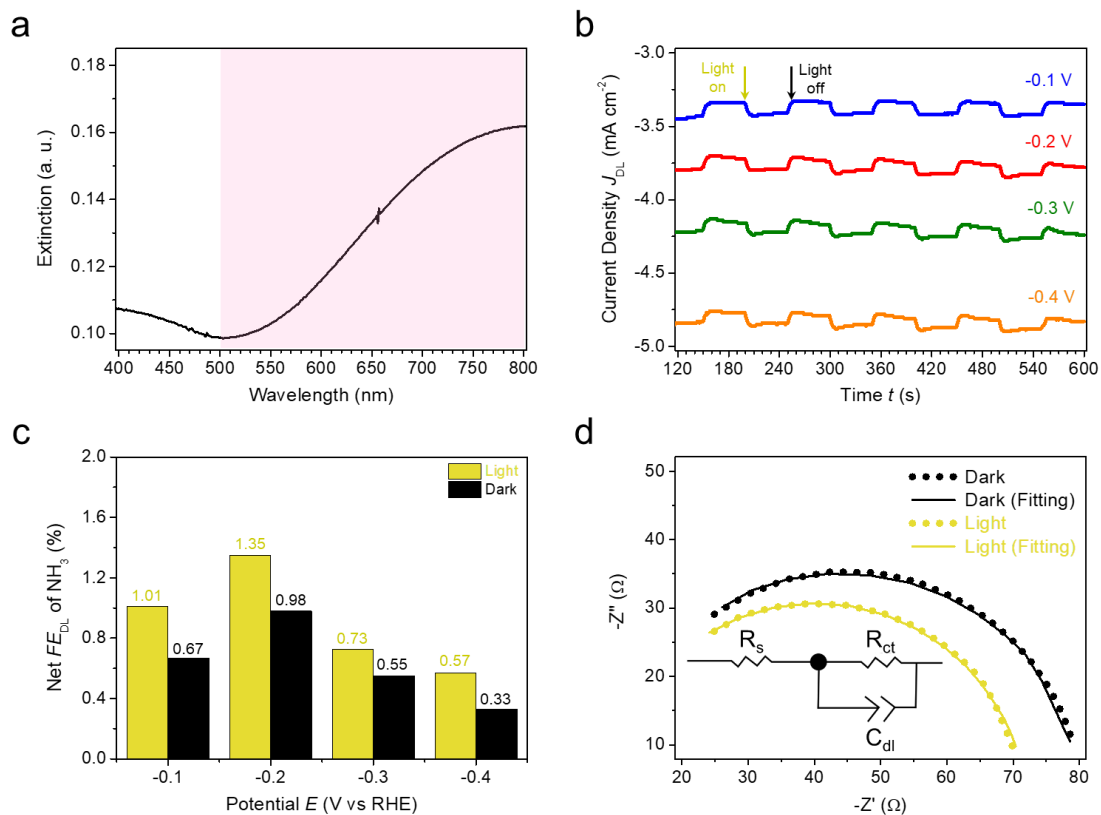

**Figure S18.** (a) UV-Vis spectra of suspended CuAu HNBS. (b)  $J$ - $t$  plot of NRR catalyzed by CuAu HNBS under solar light (1 sun) with on-off switching. (c) Net  $NH_3$  Faradaic efficiencies in  $N_2$ RR catalyzed by CuAu HNBS in dark and under solar light illumination. (d) Nyquist plots for CuAu HNBS in dark and under solar light illumination.



**Table S1.** Summary of N<sub>2</sub> reduction to NH<sub>3</sub> in aqueous solution at ambient conditions

| Cathode Materials                                                                  | Electrolyte                           | FE of NH <sub>3</sub> at <i>E</i> (vs RHE) | References                                                       |
|------------------------------------------------------------------------------------|---------------------------------------|--------------------------------------------|------------------------------------------------------------------|
| Li <sup>+</sup> -incorporated PEBCD                                                | 0.5 M Li <sub>2</sub> SO <sub>4</sub> | 1.71% at −0.7 V                            | <i>J. Am. Chem. Soc.</i> <b>2017</b> , 139, 9771–9774            |
| Pd <sub>0.2</sub> Cu <sub>0.8</sub> /RGO                                           | 0.1 M KOH                             | 0.6% at −0.2 V                             | <i>J. Mater. Chem. A</i> <b>2018</b> , 6, 17303–17306            |
| spinel Fe <sub>3</sub> O <sub>4</sub> nanorods on Ti mesh                          | 0.1 M Na <sub>2</sub> SO <sub>4</sub> | 2.6% at −0.4 V                             | <i>Nanoscale</i> <b>2018</b> , 10, 14386–14389.                  |
| TiO <sub>2</sub> /Ti                                                               | 0.1 M Na <sub>2</sub> SO <sub>4</sub> | 2.50% at −0.7 V                            | <i>ACS Appl. Mater. Interfaces</i> <b>2018</b> , 10, 28251–28255 |
| NiO nanodots on graphene                                                           | 0.1 M Na <sub>2</sub> SO <sub>4</sub> | 7.8% at −0.7 V                             | <i>ACS Appl. Energy Mater.</i> <b>2019</b> , 2, 2288–2295        |
| Cr <sub>2</sub> O <sub>3</sub> -rGO                                                | 0.1 M HCl                             | 7.33% at −0.6 V                            | <i>Inorg. Chem.</i> <b>2019</b> , 58, 2257–2260                  |
| Cr <sub>0.1</sub> CeO <sub>2</sub> nanorods                                        | 0.1 M Na <sub>2</sub> SO <sub>4</sub> | 3.84% at −0.7 V                            | <i>Inorg. Chem.</i> <b>2019</b> , 58, 5423–5427                  |
| Ultrathin Ni <sub>0.50</sub> Fe <sub>0.50</sub> B nanosheets                       | 0.1 M KOH                             | 3.19 % at −0.3 V                           | <i>ACS Appl. Energy Mater.</i> <b>2020</b> , 3, 9516–9522        |
| CoS <sub>2</sub> nanoparticles-embedded N-doped carbon nanobox derived from ZIF-67 | 0.1 M HCl                             | 4.6% at −0.15 V                            | <i>ACS Sustainable Chem. Eng.</i> <b>2020</b> , 8, 29–33         |
| CuAu nanocage on carbon paper                                                      | 0.1 M KOH, N <sub>2</sub>             | 7.4% at −0.2 V                             | This work                                                        |
